# Supplementary material for: A Retrospective, Descriptive Study of Dyspnea Management in a Multidisciplinary Interstitial Lung Disease Clinic
Source: PubMed Central journal article supplement — Am J Hosp Palliat Care. 2022 Apr 28;40(2):153–63. doi: 10.1177/10499091221096416 (PMC9850391; doi:10.1177/10499091221096416), 2022-04-28
Supplement: sj-pdf-1-ajh-10.1177_10499091221096416.pdf [file sj-pdf-1-ajh-10.1177_10499091221096416.pdf]

**Table S1.** Trajectory of individual dyspnea scores over time

|                                                    | Resting  | Eating   | Talking  | Dressing | Bathing  | Bowel<br>Movement | Stairs   | Exercise |
|----------------------------------------------------|----------|----------|----------|----------|----------|-------------------|----------|----------|
| Increasing NRS<br>Dyspnea Score<br>Trend, % (n)    | 53% (17) | 53% (18) | 50% (16) | 59% (19) | 74% (23) | 56% (18)          | 61% (14) | 45% (10) |
| Decreasing<br>NRS Dyspnea<br>Score Trend, %<br>(n) | 47% (15) | 47% (16) | 50% (16) | 41% (13) | 26% (8)  | 44% (14)          | 39% (9)  | 55% (12) |

Abbreviations: NRS, numerical rating scale

Only patients with  $\geq 3$  numerical rating scale scores were included in the analysis of trend. Any patient with an increase in NRS  $\geq 1$  were considered to have an increasing trend. Any patient with a decrease in NRS  $\geq 1$  were considered to have a decreasing trend.
